# Supplementary material for: Ag–Cu2O composite microstructures with tunable Ag contents: synthesis and surface-enhanced (resonance) Raman scattering (SE(R)RS) properties
Source: Royal Society of Chemistry journal article supplement (doi:10.1039/c4ra00675e), 2014-01-01

Electronic supplementary information

**Ag-Cu<sub>2</sub>O composite microstructures with tunable Ag contents: synthesis and surface-enhanced (resonance) Raman scattering (SE(R)RS) properties**

Lihua Yang, Jian Lv, Yongming Sui, Wuyou Fu, Xiaoming Zhou, Jinwen Ma, Qian Li, Meiling Sun, Yannan Mu, Yanli Chen, Haibin Yang\*

*State Key Laboratory of Superhard Materials, Jilin University, Changchun 130012, P. R. China*

\*Corresponding author: Tel.: +86 431 85168763, fax: +86 431 85168763.

E-mail: [yanghb@jlu.edu.cn](mailto:yanghb@jlu.edu.cn)

**Synthesis of Ag nanoparticles (NPs)**

The Ag NPs with an average size of 100 nm were prepared by sodium citrate reducing AgNO<sub>3</sub> aqueous solution. Typically, 0.12g AgNO<sub>3</sub> was dispersed in 76 mL of deionized water, followed by addition of 4 ml of sodium mixture solution (0.74 M sodium citrate and 1.2 M sodium carbonate mixed solution) slowly. After the mixture was stirred for 10 min, 6 g PVP (K-30; Mw=30 000) was mixed with vigorous stirring in a round-bottomed glass flask. After the complete dissolution of the PVP powder, the solution was kept in a water bath at a temperature of 80 °C for 20 min, yielding the gray Ag NPs.

**Fig. S1** (A) FESEM and (B) XRD of the bare Ag NPs prepared by reduction of silver nitrate with trisodium citrate

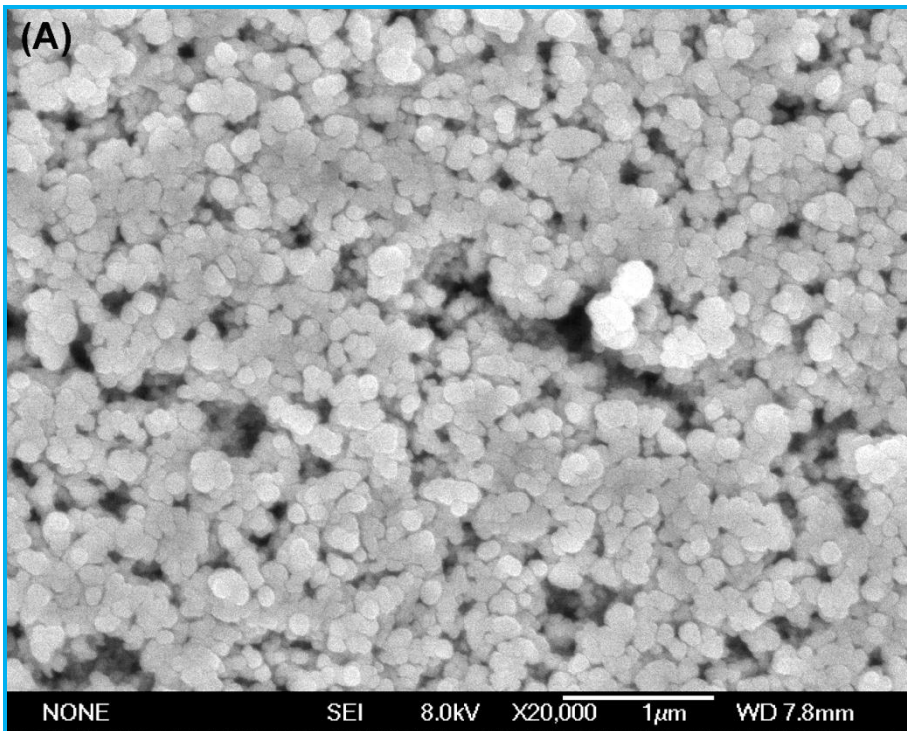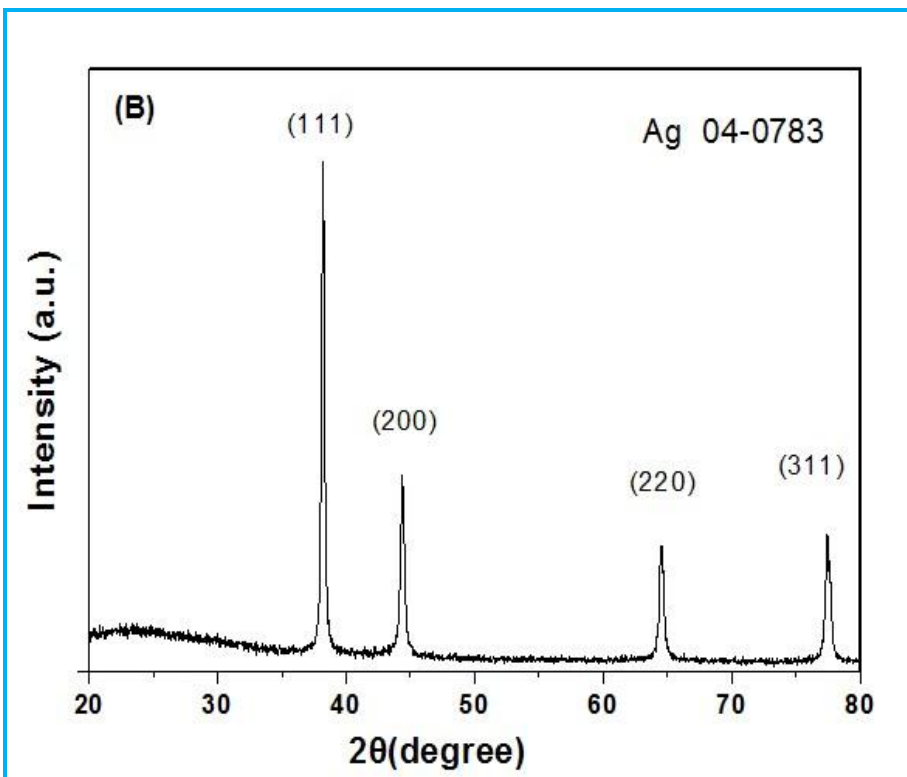

**Scheme 2** A Schematic image of charge transfer between  $\text{Cu}_2\text{O}$  and Ag.

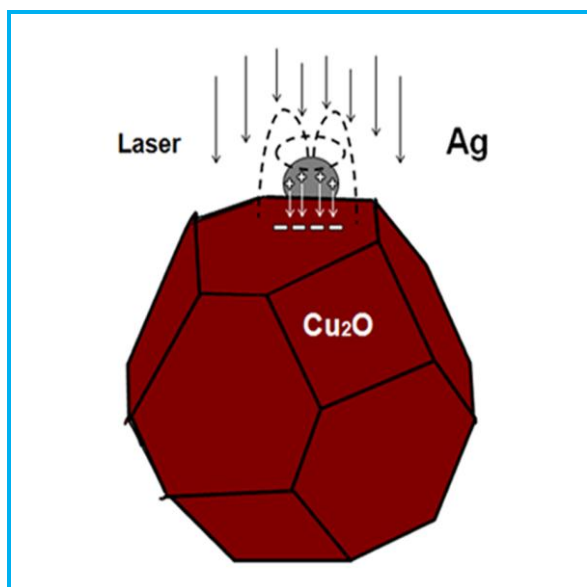

Supplement: c4ra00675e1.pdf [file c4ra00675e1.pdf]
